# Supplementary material for: Many paths to one goal: Identifying integrated rice root phenotypes for diverse drought environments
Source: Frontiers journal article supplement (doi:10.3389/fpls.2022.959629), 2022-08-22
Supplement: Image_1.pdf [file Image_1.pdf]

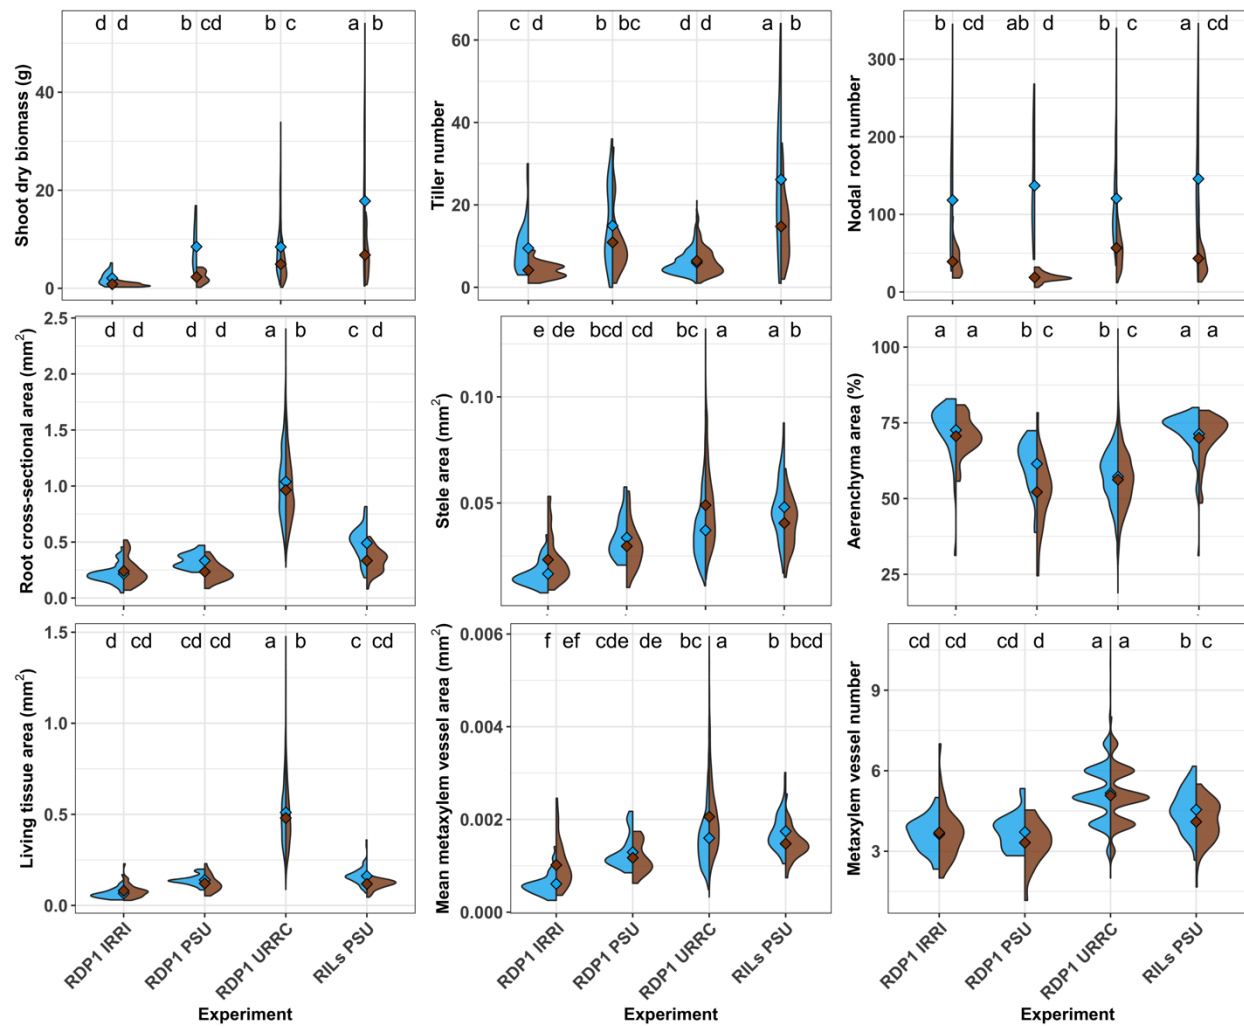

Supplemental Figure 1: Phenotype distributions within treatments and experiments. Shoot and root phenotypes under well-watered (blue) and drought (brown) treatments within each experiment. Diamonds represent the median value of the trait. Letters indicate significance groups ( $\alpha = 0.1$ ) determined by multiple comparisons tests using Tukey's method.
