# Supplementary material for: Many paths to one goal: Identifying integrated rice root phenotypes for diverse drought environments
Source: Frontiers journal article supplement (doi:10.3389/fpls.2022.959629), 2022-08-22
Supplement: Image_2.pdf [file Image_2.pdf]

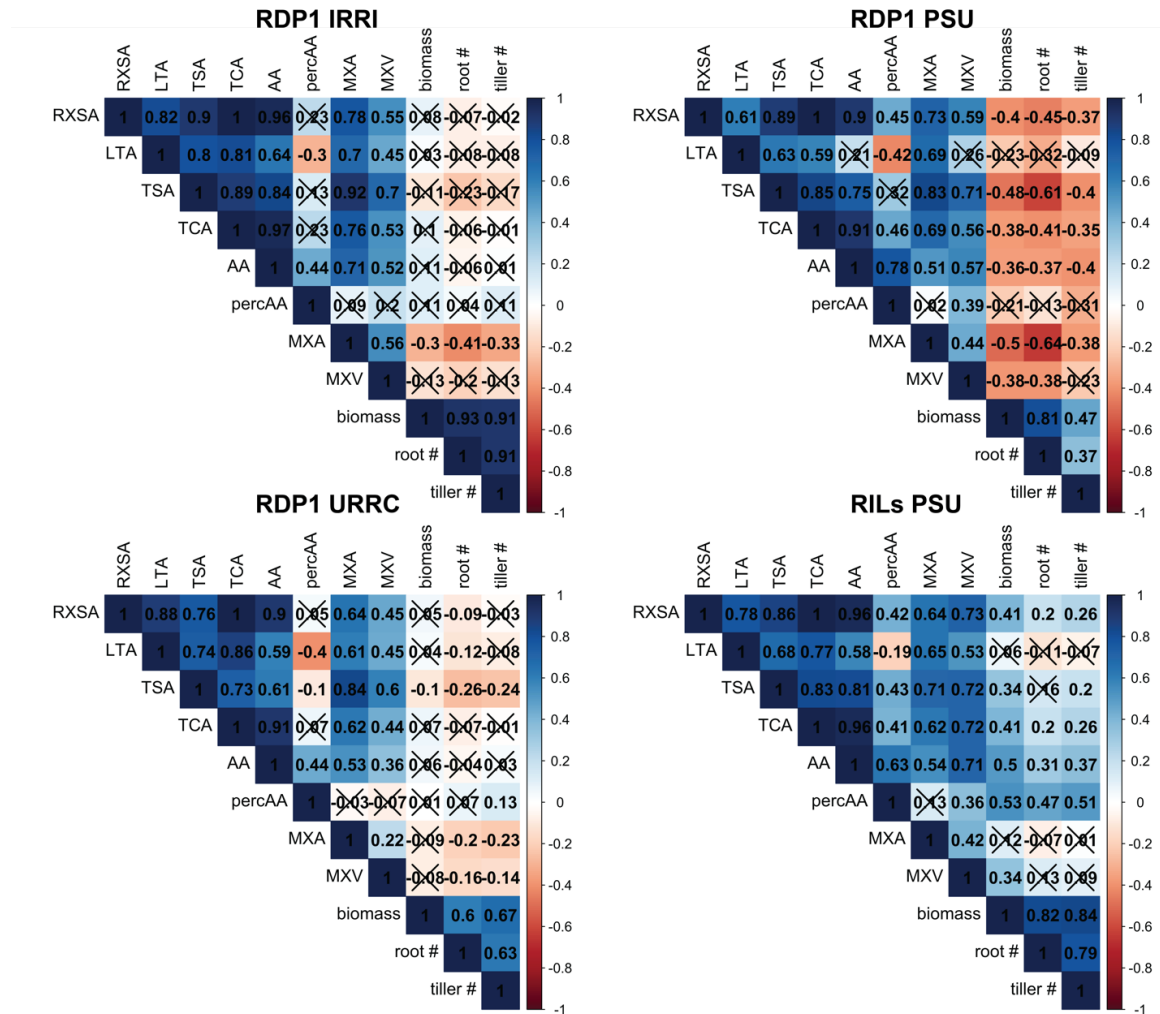

Supplemental Figure 2: Correlation matrix in combined locations. Correlation matrices of root anatomical traits, shoot dry biomass, nodal root number and tiller number under well-watered treatment within experiments. Each box shows the correlation coefficient,  $r$ , between each trait. X's indicate that the correlation was not significant below  $\alpha = 0.1$ . See Table 1 for phenotype abbreviations.
