# Supplementary material for: Many paths to one goal: Identifying integrated rice root phenotypes for diverse drought environments
Source: Frontiers journal article supplement (doi:10.3389/fpls.2022.959629), 2022-08-22
Supplement: Image_4.pdf [file Image_4.pdf]

## A Drought

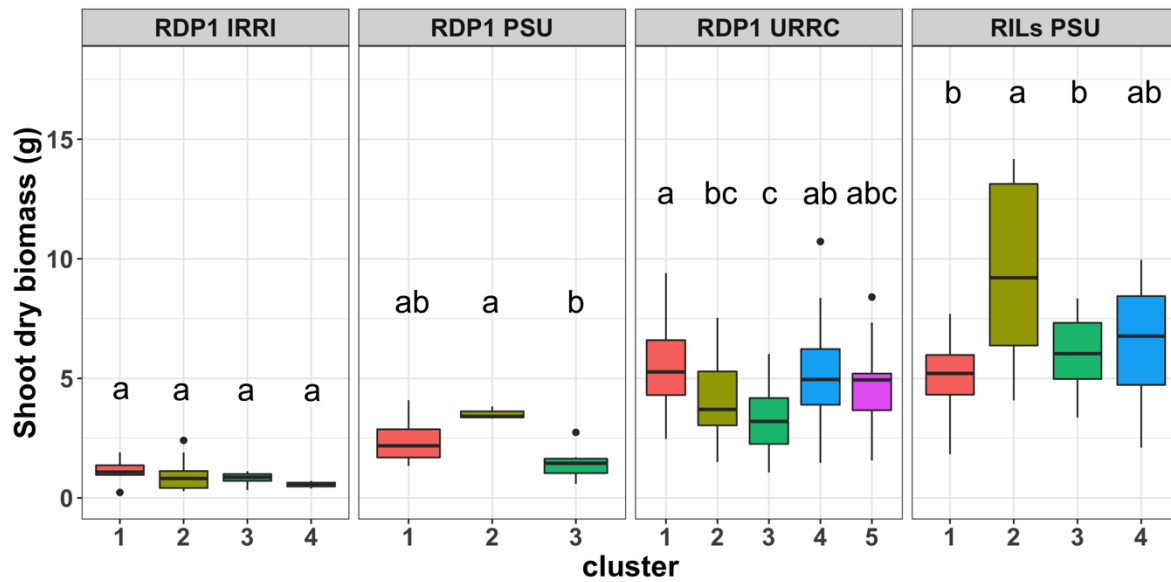

## B Well-watered

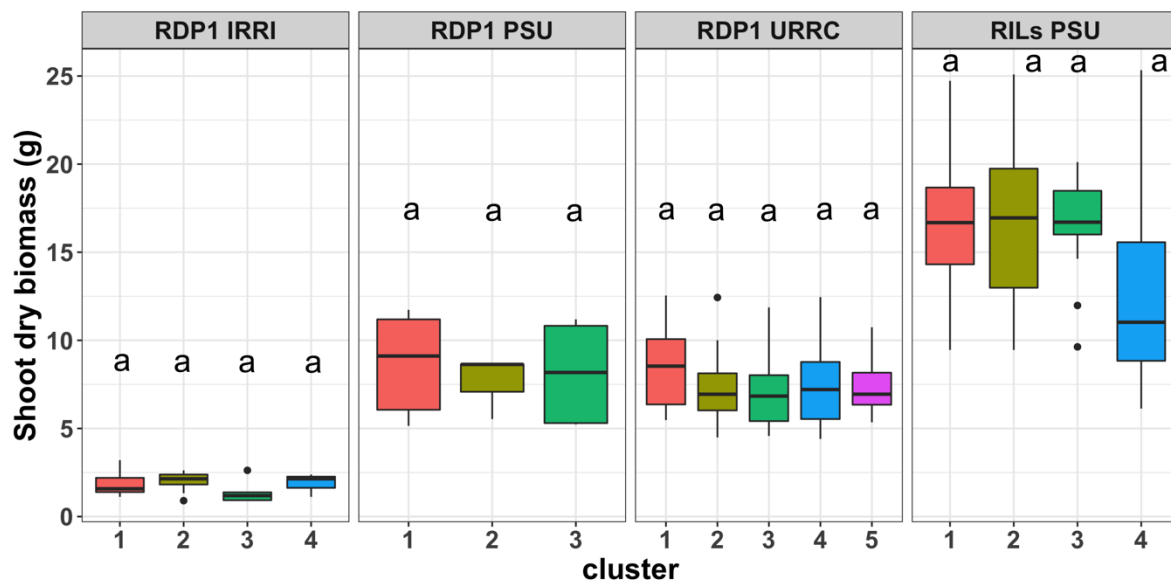

Supplemental Figure 4: Biomass in drought and well-watered treatment across clusters. Shoot dry biomass in A) drought and B) well-watered conditions of individuals within each cluster in each experiment. Letters indicate significance groups ( $\alpha = 0.1$ ) determined by multiple comparisons tests using Tukey's method.
